# Supplementary material for: Neuronally produced betaine acts via a ligand-gated ion channel to control behavioral states
Source: PubMed Central journal article supplement (PMC9860315; doi:10.1073/pnas.2201783119), 2022-11-21
Supplement: pnas.2201783119.sapp.pdf [file pnas.2201783119.sapp.pdf]

# Figure S1

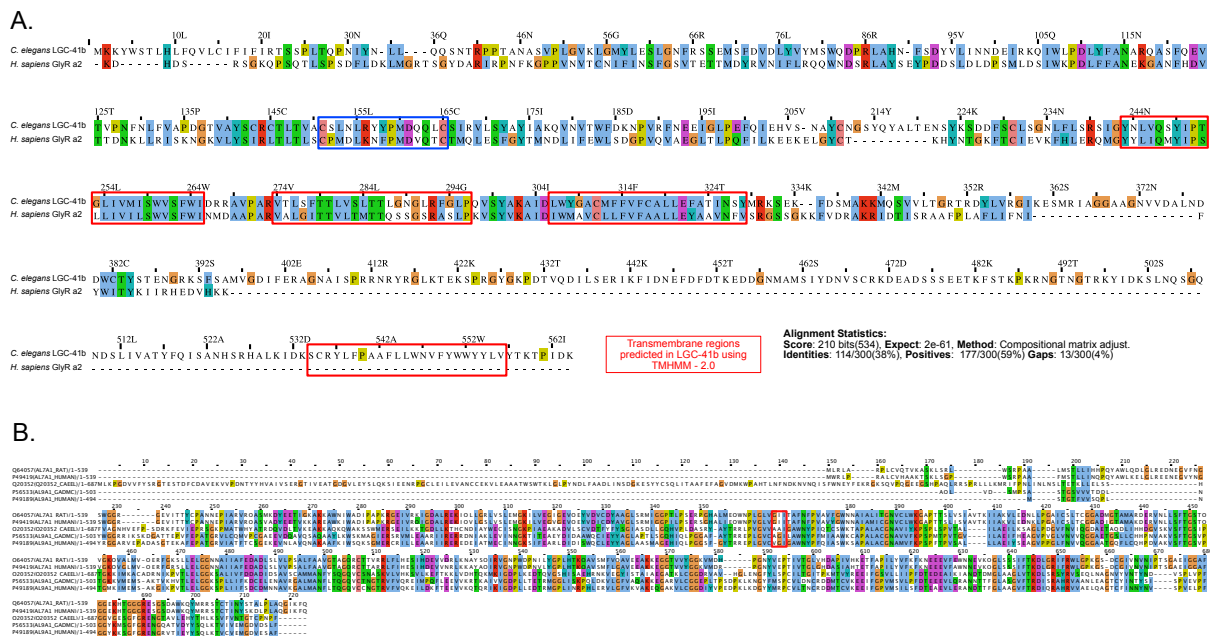

## Supplementary Figure 1. Alignments of *C. elegans* LGC-41 and ALH-11 with homologs

from other species. (A-B) Full length alignments generated with CLUSTAL omega. (A)

Alignment of *C. elegans* LGC-41 and human GLYRA2. Red boxes show location of transmembrane domains in LGC-41 predicted by TMHMM2.0. Blue box highlights conserved cys-loop. (B)

Alignment of *C. elegans* ALH-11 with close homologs from rat, human and cod, uniprot IDs given. Red box shows location of *alh-11(lj118)* mutation.

**Figure S2**

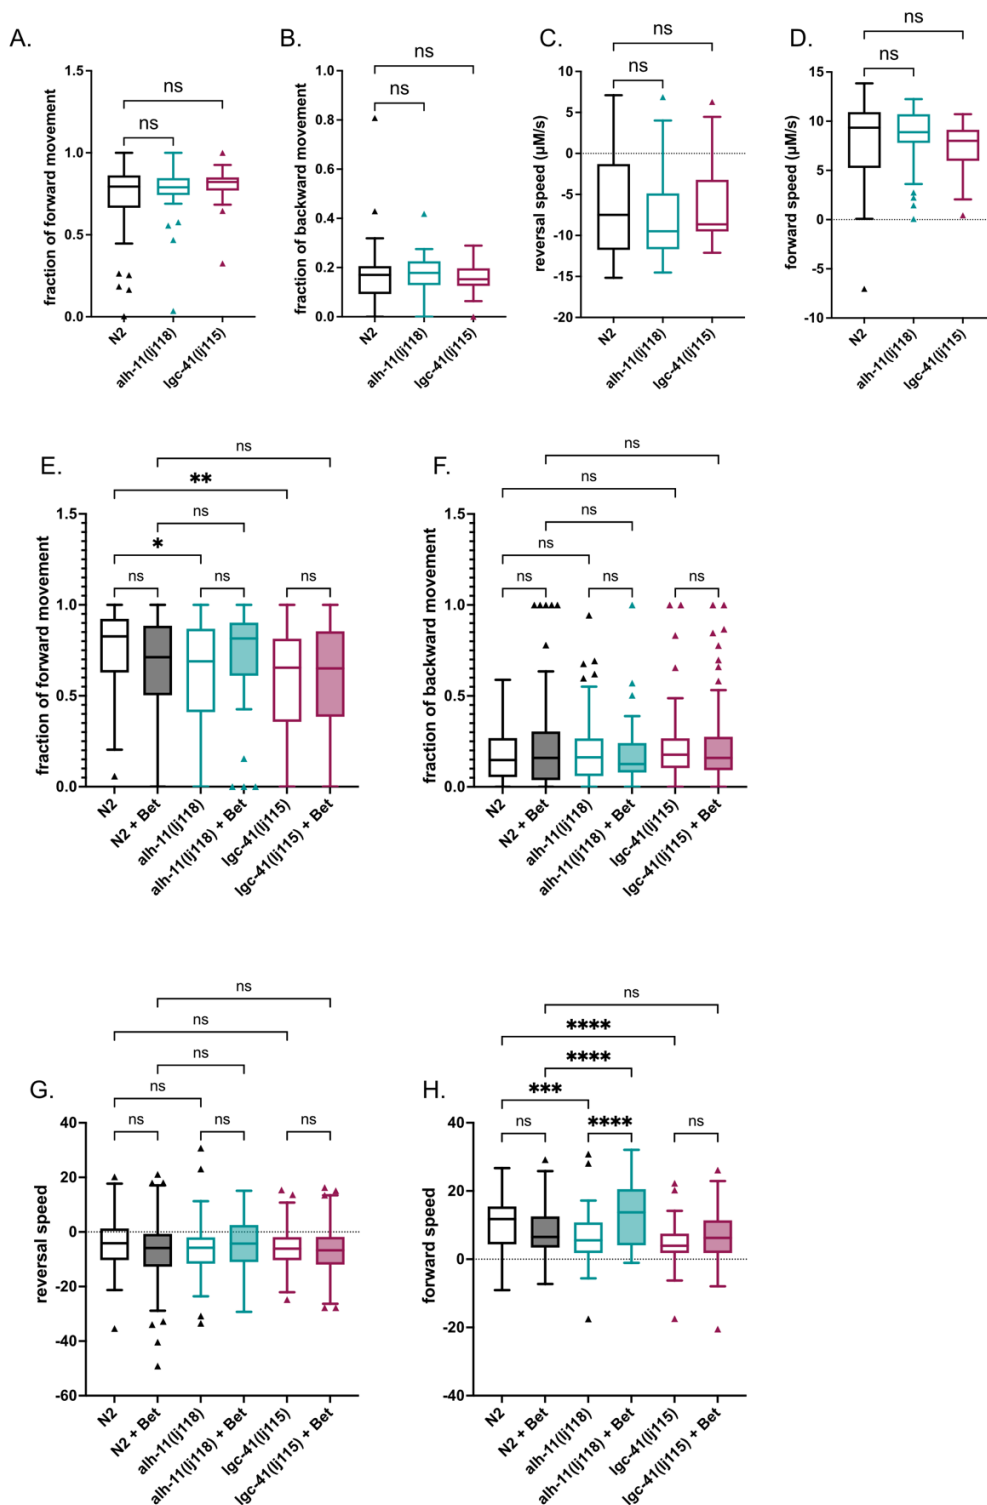

**Supplementary Figure 2. Basic locomotion features of *N2* and *lgc-41* and *alh-11* mutant worms on food, off food and on food supplemented with betaine.** Basic locomotion features of *N2* (wild-type), *alh-11(lj118)* and *lgc-41(lj115)* animals, shown as Tukey's box plots, (A-

**D)** in the first 5 min off food, (**E-H**) over a 15 min period on food (OP50), in the presence or absence of 10 mM betaine. Statistical significance calculated by one-way ANOVA with Sidak's correction for multiple comparisons, \*=P<0.05, \*\*=P<0.01, \*\*\*=P<0.005, \*\*\*\*=P<0.001, ns=not significant. (**A-D**) N=39-53 animals (**E-H**) N=62-159 animals. Features are calculated using tierpsy summary function and have been renamed for simplicity as follows: fraction of forward movement = 'motion\_mode\_forward\_fraction', fraction of reverse movement = 'motion\_mode\_backward\_fraction', reversal speed = 'speed\_10<sup>th</sup>', forward speed = 'speed\_50<sup>th</sup>'.

**Figure S3**

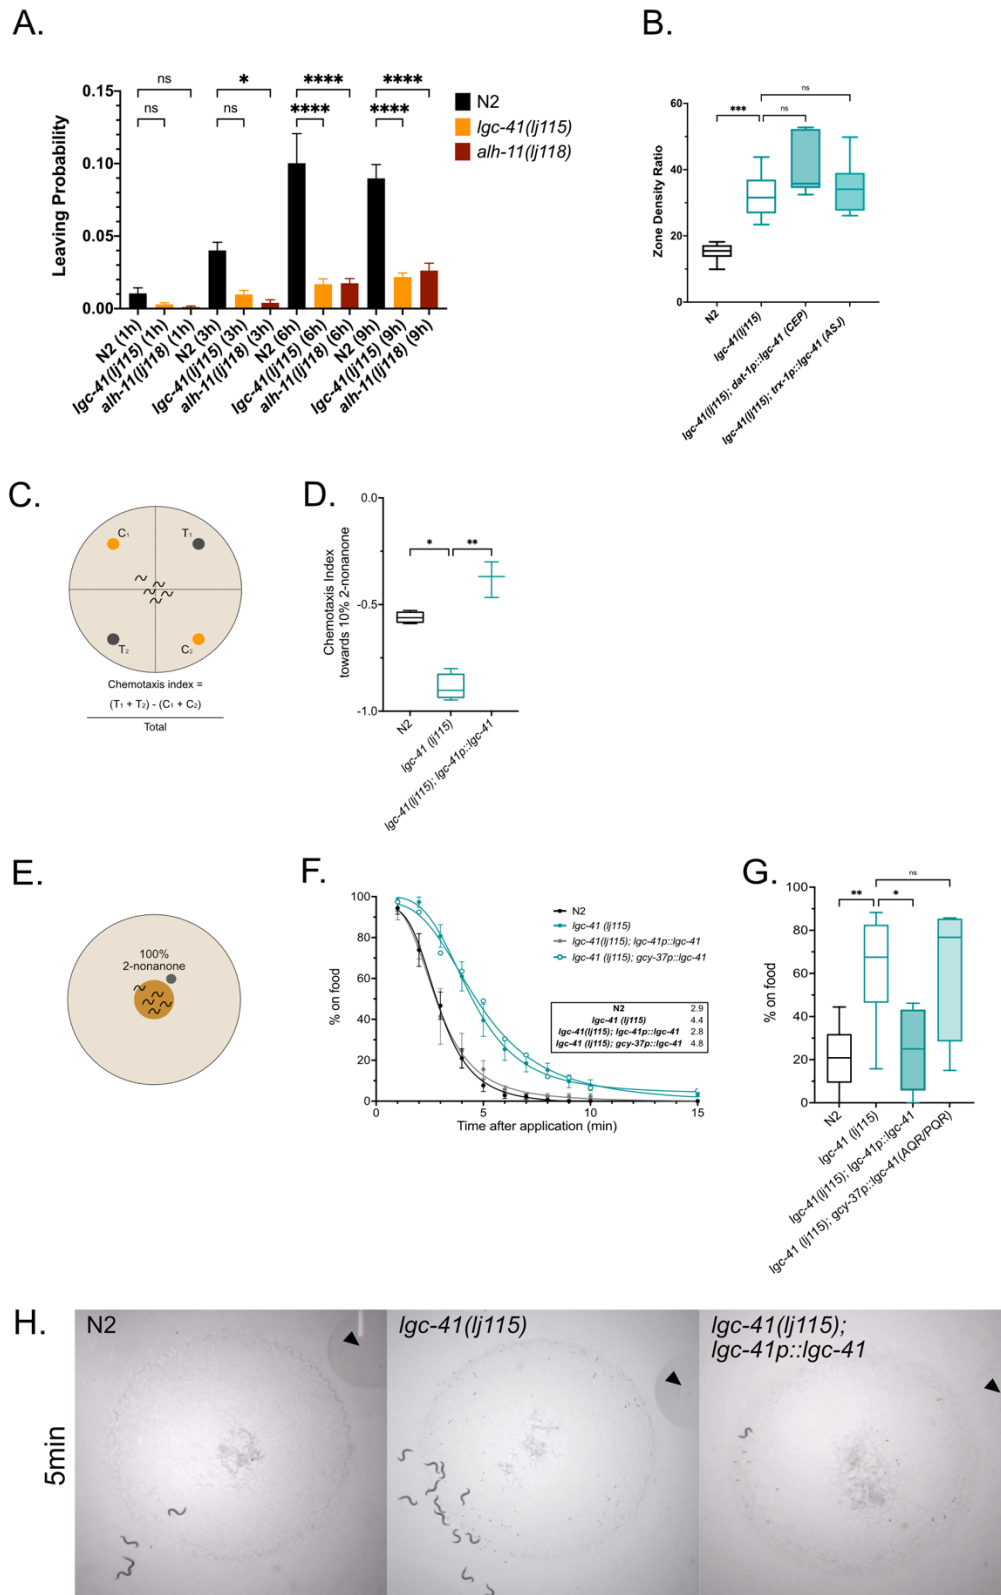

**Supplementary Figure 3. *lgc-41* mutant worms display defective 2-nonanone induced food leaving behaviour.** Behavioural responses of N2 (wild-type), *lgc-41(lj115)*, *lgc-41(lj115);*

*lgc-41p::lgc-41, lgc-41(lj115); gcy-37p(AQR/PQR)::lgc-41, lgc-41(lj115); dat-1p(CEP)::lgc-41, lgc-41(lj115); trx-1p(ASJ)::lgc-41* and *alh-11(lj118)* worms. **(A)** Food leaving probability time course, n=5 plates for each genotype and each time point. Significance calculated by two-way ANOVA with Tukey's correction for multiple comparisons. \* P<0.05, \*\*\*\* P<0.0001. **(B)** Box plot of dispersal propensity of N2, *lgc-41(lj115)*, *dat-1p(CEP)::lgc-41* and *lgc-41(lj115); trx-1p(ASJ)::lgc-41* worms, in which central zone density is calculated and plotted. N=6-8 plates per genotype. Tukey's blot plots and one-way ANOVA with Tukey correction for multiple comparisons, \*\*\*=P<0.001. **(C)** Schematic representation of chemotaxis experiment, **(D)** box plot of chemotaxis index towards 10% 2-nonanone. N=3-5 plates per genotype. **(E)** Schematic representation of the experimental design of 100% 2-nonanone induced food leaving, the graph **(F)** displays percentage of worms on food each minute after 2-nonanone application for 15 min, curves fit with a four-parameter variable slope, insert gives time in minutes when 50% of worms have left the food patch. N=5-12 plates per genotype, error bars represent SEM. **(G)** Box plot of percentage of worms on the food patch 4 min after 2-nonanone application. N=5-12 plates per genotype. **(H)** Representative images of N2, *lgc-41* mutant and *lgc-41* rescue worms 5 min after 2-nonanone application, black arrow indicate 2-nonanone droplet.

**Figure S4**

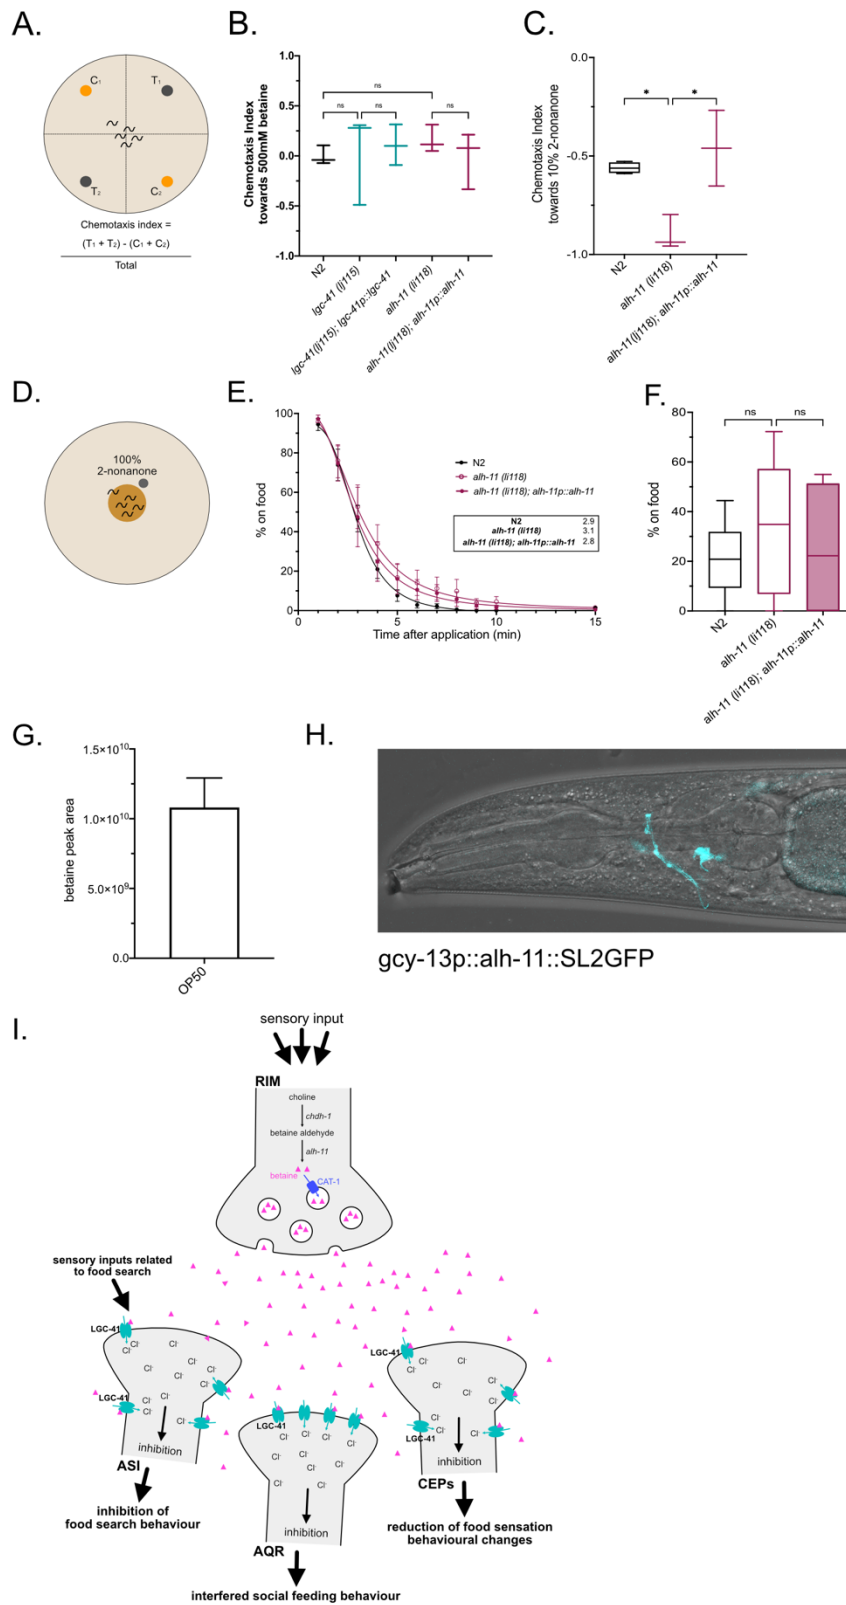

Supplementary Figure 4. *lgc-41* and *alh-11* mutant worms display normal betaine chemotaxis, *alh-11* worms also display normal 2-nonanone induced food leaving

**behaviour.** Behavioural responses of N2 (wild-type), *lgc-41(lj115)*, *lgc-41(lj115); lgc-41p::lgc-41*, *alh-11(lj118)* and *alh-11(lj118);alh-11p::alh-11* worms. (A) Schematic representation of chemotaxis experiment, (B) Chemotaxis towards or away from 500 mM betaine in wildtype (N2) or *lgc-41(lj115)*, *alh-11(lj118)* mutants or genomic rescue lines. N=3-5 per genotype, significance calculated by one-way ANOVA with Tukey's correction for multiple comparisons. (C) box plot of chemotaxis index towards 10% 2-nonanone. N=3-5 plates per genotype, \* P<0.05. (D) Schematic representation of the experimental design of 100% 2-nonanone induced food leaving, the graph (E) displays percentage of worms on food each minute after 2-nonanone application for 15 min, curves fit with a four-parameter variable slope, insert gives time in minutes when 50% of worms have left the food patch. N=5-12 plates per genotype, error bars represent SEM. (F) Box plot of percentage of worms on the food patch 4 min after 2-nonanone application. N=5-12 plates per genotype. (G) Mass spectrometry analysis of betaine content in *E.coli* (OP50). The data shows peak area for betaine. Error bars represent SEM of 5 samples. (H) Fluorescent reporter image of RIM specific expression of *alh-11* under the control of *gcy-13p*. (I) Graphical cartoon outlining the suggested betaine and LGC-41 mechanism.

**Figure S5**

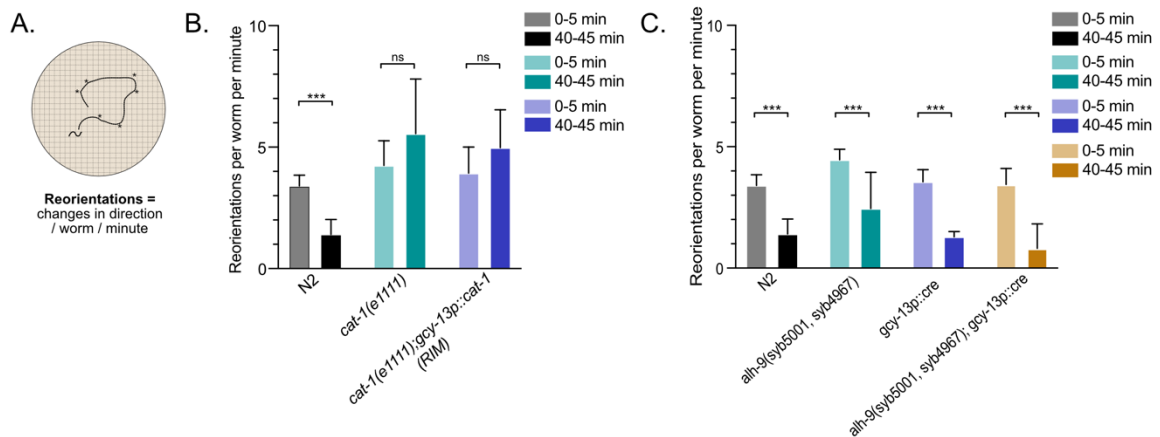

**Supplementary Figure 5. *cat-1* but not *alh-9* RIM mutants are defective in global food search.** (A) Schematic describing the principle of the reorientation experiment. (B) Worm reorientation events off food at two different time points show that *cat-1* mutant worms are defective in switching between local and global food search. The defect cannot be rescued by expressing *cat-1* in the RIM neurons. (C) Reorientation events in a cre-induced *alh-9* CRISPR mutant line shows no effect on the food search behaviour upon expression of cre in the RIM neurons. (B, C) The data is presented as median values with 95% CI, a Kruskal-Wallis test was used for calculation significant difference between the timepoints and groups.

\*  $P < 0.05$ , \*\*  $P < 0.005$ , \*\*\*  $P < 0.0005$ .



**Table S1: Strain list**

| Strain No. | Description                                                                    |
|------------|--------------------------------------------------------------------------------|
| AQ4633     | <i>alh-11(lj118) (bc 3x)</i>                                                   |
| AQ4618     | <i>lgc-41(lj115) (bc 4x)</i>                                                   |
| AQ4658     | <i>lgc-41(lj119) (bc 4x)</i>                                                   |
| AQ4888     | <i>ljEx1479[alh-9p::alh-9::SL2GFP; unc-122p::RFP] on OH15262</i>               |
| AQ4913     | <i>ljEx1489[chdh-1p::chdh-1::SL2 GFP; unc-122p::RFP] on OH15262</i>            |
| AQ4550     | <i>him-5(e1490); ljEx1305[alh-11p(3kb)::alh-11::SL2-mKate2; unc-122p::gfp]</i> |
| AQ4525     | <i>him-5(e1490); ljEx1297[alh-9p(1.5kb)::alh-9::SL2-mKate2; unc-122p::gfp]</i> |
| AQ4523     | <i>him-5(e1490); ljEx1295[chdh-1p(2kb)::chdh-1::SL2-mKate2; unc-122p::gfp]</i> |
| AQ4404     | <i>him-5(e1490); ljEx1250[lgc-41p(2kb)::lgc-41::SL2-mKate2; unc-122p::gfp]</i> |
| AQ4391     | <i>ljEx1244[lgc-41p(2kb)::mKate2::gpd-23'UTR; unc-122p::gfp]</i>               |
| OH15262    | "NeuroPAL" <i>otEx7057</i>                                                     |
| AQ5152     | <i>alh-11(lj118); ljEx1595[alh-11p(3kb)::alh-11::SL2GFP; unc-122p::RFP]</i>    |
| AQ5177     | <i>alh-11(lj118); ljEx1603[gcy-13p::alh-11::SL2GFP; unc-122p::RFP]</i>         |
| AQ5135     | <i>lgc-41(lj115); ljEx1584[gcy-37p::lgc-41::SL2mKate; unc-122p::gfp]</i>       |
| AQ5088     | <i>lgc-41(lj115); ljEx1576[daf7p(4.5kb)::lgc-41::SL2mKate; unc-122p::gfp]</i>  |
| AQ5224     | <i>lgc-41(lj115); ljEx1619[dat-1p::lgc-41::SL2mKate; unc-122p::gfp]</i>        |
| AQ5225     | <i>lgc-41(lj115); ljEx1619[trx-1p::lgc-41::SL2mKate; unc-122p::gfp]</i>        |
| AQ5241     | <i>alh-9(syb5001, syb4967); ljEx1643[gcy-13p::cre::sl2GFP, unc-122p::RFP]</i>  |
| AQ5242     | <i>ljEx1644[gcy-13p::cre::sl2GFP, unc-122p::RFP]</i>                           |
| AQ5235     | <i>alh-9(syb5001, syb4967)</i>                                                 |
| AQ5277     | <i>cat-1(e1111); ljEx1649[gcy-13p::cat-1 cDNA::sl2GFP, unc-122p::RFP]</i>      |
| AQ0149     | <i>cat-1(e1111)</i>                                                            |

Note:

*chdh-1* previously called C34C6.4

bc: backcrossed

Bacterial strain list:

| Strain name          | Aquired from          |
|----------------------|-----------------------|
| OP50                 | CGC                   |
| <i>betA</i> (JW0303) | Horizon Discovery Ltd |
| <i>K12</i> (BW25113) | Horizon Discovery Ltd |

**Table S2: CRISPR alleles**

| Allele                                                 | N2 sequence                                                                                                                                                                                      | Mutant sequence                                                                                                                                            |
|--------------------------------------------------------|--------------------------------------------------------------------------------------------------------------------------------------------------------------------------------------------------|------------------------------------------------------------------------------------------------------------------------------------------------------------|
| <i>lgc-41</i><br>( <i>lj115</i> )<br><i>frameshift</i> | Tgatttgactttgcaaatgcaaggcaagcaag<br>ctttcaagaggttactgttcccaattttaactgt<br>ttgttcaccagatggtactgtcgcatactcctg<br>tagatgtacactta <del>cggtggctttagttgaac</del><br>ctaaggtaaaaaaaaaagtaaataaactgaatg | TGATTTGTACTTTGCGAATGCAAGGCAA<br>GCAAGCTTTCAAGAGTTACTGTTCCCA<br>ATTTTAATCTGTTTGTTCACCAGATGGT<br>ACTGTCGCATACTCCTGTAGATGTACACT<br>TAGGCTTGATGTTTGAACCTAAGGTA |

|                                                        |                                                                                                                                                                                                                                                                                                                                                                                                                                                                                                                                                                                                                                                                                                                                                                                                                                                                                                                                                                                                                                                                                                                                                                                                                                                                                                                                                                                                             |                                                                                                                                                                                                                                                                                                                                                                                                                                                                                                                                                                                                                                                                                                                                                                                                                                                                                                                                                                                                                                                                                                                                                                                                                                                                                                                                                                                                                                                                                                                                                                                            |
|--------------------------------------------------------|-------------------------------------------------------------------------------------------------------------------------------------------------------------------------------------------------------------------------------------------------------------------------------------------------------------------------------------------------------------------------------------------------------------------------------------------------------------------------------------------------------------------------------------------------------------------------------------------------------------------------------------------------------------------------------------------------------------------------------------------------------------------------------------------------------------------------------------------------------------------------------------------------------------------------------------------------------------------------------------------------------------------------------------------------------------------------------------------------------------------------------------------------------------------------------------------------------------------------------------------------------------------------------------------------------------------------------------------------------------------------------------------------------------|--------------------------------------------------------------------------------------------------------------------------------------------------------------------------------------------------------------------------------------------------------------------------------------------------------------------------------------------------------------------------------------------------------------------------------------------------------------------------------------------------------------------------------------------------------------------------------------------------------------------------------------------------------------------------------------------------------------------------------------------------------------------------------------------------------------------------------------------------------------------------------------------------------------------------------------------------------------------------------------------------------------------------------------------------------------------------------------------------------------------------------------------------------------------------------------------------------------------------------------------------------------------------------------------------------------------------------------------------------------------------------------------------------------------------------------------------------------------------------------------------------------------------------------------------------------------------------------------|
|                                                        | ttaatttcgcaatthtttagatactaccaatggat<br>caacagctttggt                                                                                                                                                                                                                                                                                                                                                                                                                                                                                                                                                                                                                                                                                                                                                                                                                                                                                                                                                                                                                                                                                                                                                                                                                                                                                                                                                        | AAAAAAGTAAATAAACTGAATGTTAATT<br>TCGCAATTTTAGATACTACCCAATGGATC<br>AACAGCTTTGTT                                                                                                                                                                                                                                                                                                                                                                                                                                                                                                                                                                                                                                                                                                                                                                                                                                                                                                                                                                                                                                                                                                                                                                                                                                                                                                                                                                                                                                                                                                              |
| <i>alh-11</i><br>( <i>lj118</i> )<br><i>frameshift</i> | ggtgacagcgggctgggcttatatatgacagca<br>tttcacagccagtgctggtgagttttccagg<br>agcatgtttgaattggatagttccaggcaccgat<br>ggcggcgaccactccaacaggaagacggcgtg<br>tataggcgtaacgagaagcatcgagtggaacg<br>tgtgaccgagaaggtcagatgctagatthttg<br>agatcagg                                                                                                                                                                                                                                                                                                                                                                                                                                                                                                                                                                                                                                                                                                                                                                                                                                                                                                                                                                                                                                                                                                                                                                          | ggtgacagcgggctgggcttatatatgacagcattc<br>cacagccagtgctggtgagttttccaggagcatgt<br>ttgaattggatagttccaggcaccgacgaccactcca<br>acaggaagacggcgtgtataggcgtaacgagaagc<br>atcgagtggaacgtgtgaccgagaaggtcagatgc<br>tagatthttggagatcagg                                                                                                                                                                                                                                                                                                                                                                                                                                                                                                                                                                                                                                                                                                                                                                                                                                                                                                                                                                                                                                                                                                                                                                                                                                                                                                                                                                  |
| <i>lgc-41</i><br>( <i>lj119</i> )<br><i>insertion</i>  | aaacactthtaactthttcagcggttcctgctcg<br>cgtcacattaagttccaccactggtctctcta<br>ccactctgtaagthtttgagtacttggtgac<br>ggtcagccgatgctcttctgcaagaatgaca<br>tatcactthtttagggaaacggacttcgattgg<br>acttcacaagtgagctatgaaaagccatcga<br>cttggtgacggaggtataaagaacaatcca<br>cccatttgggaatacacattattcaacttcttca<br>gctgtatgttctctcttthttgacactthttgaa<br>thttgcaactataaatagctacatcgaaagtcg<br>gaaaaattgatagatggcaagaaaatgca<br>aagtggtactcactggaagaagtaagatag<br>gcaatagactgcaaatcaaaaatttcagattg<br>catggttatattcactgatcgtagatctctattht<br>tcagttccccatcttaaatccattactcta<br>ttacagactthttgacgacgcacgatccaaata<br>gthttctgactcattthttgthttcacttctatth<br>ctatcacatggaagattgaagatgcaccgata<br>ccgttaattthgcatctctcaatccgtacaatta<br>atgtaactaagttaggtcaaatctgaaattccag<br>caaggactatttggttcgcgcatcaaagaga<br>gcatgcggtatgcaggaggagcagccgaaac<br>gthttggtgacgactcaacgacgattggtgact<br>actccacagagaacggacgtaagagcttctcc<br>gcaatggtcggagacatthttgaaagagccggc<br>aatgcatthttctcccgtagaaacagatacaga<br>ggtgtagatcagtggtgacatthttctthtaata<br>cactaaaatccgtgthttggtthttgattggtthtc<br>ctggagacgtctagaaaacatgthaaattccgth<br>agagtaaacatagtcatttggaaaaacagaa<br>atagtggaagttagatthttcttgaggata<br>aacaattaatgtataagaagcaattctaacaat<br>acacgtaaacctthttgthttctthttgcaacca<br>gcacaattgthttcatataggaaactcaaagtac<br>caagtacccaaaagthttactgactctthttcaa<br>ccccctacgttctccatataccatcagtgaaact<br>atcgthttatctatctgtaactgtgthttactthttc | GGttcagccgatgctcttctctgcaagaatgacat<br>atcactthtttagggaaacggacttcgatttgacttc<br>cacaagtgagctatgcaaaagccatcgaactgtggt<br>acggaggtatacaagaacaatccaccactthttgga<br>atacacattattcaacttctthttcagcgtgtatgthttc<br>gtctthttgtgactthttggaattthttgcaactataaatagc<br>tatactgcaagtcggaaaaaattgatagatggca<br>aagaaaatgcaagtggtgactcactggaagaagt<br>aagatagggcaatagactgcaaatcaaaaatttca<br>gattgcatggttatattcactgatcgtagatctctatt<br>thttcagthttccccatcttaaatccattactctaatt<br>acagactthttgacgacgcacgatccaaatagthttct<br>gactcattthttgthttcacttctatthttctatcacatg<br>gaagattgaagatgcaccgataaccgtthaaattthtc<br>atctctcaatccgtacaattaatgtactaagttaggthc<br>aaatctgaaattccagcaaggactattthttgthttcgcg<br>gcatcaaagagagcatgcggtatgcaggagCagca<br>ATGagtaaggagaagaattgthttcactggagthttgth<br>cfaatctctgctgagctcgcagggagactcaacgga<br>cacaagthttccgtctccggagaggagaggagac<br>gccactacggaaagctcaccctcaagthttcatctgca<br>ccaccggaagctcccagthttccatggccaaccctctg<br>caccacttctgctacggagthttcaatgthttctccgth<br>accagaccacatgaagcgtcagactthttcaagthc<br>cgcatgccaagaggatacgtccaagagcgtaccat<br>ctthttcaagthtaagthtttaaacatataataactaacta<br>ctgattatthtaattthttcaggacgacggaaactaca<br>gaccctgcccaggtcaagthttcagggagacaccct<br>ctgcaaccgtatcagactcaagthtaagthtttaacagth<br>tcgthtaactaaccatacatatthtaattthttcaggth<br>aatcgaactcaaggaggacggaaacatctcgggaca<br>caagctcgagtacaactacaactcccacaacgthta<br>catcatggccgacaagcaaaaagaacggaatcaagth<br>taactcaagthtaagthtttaacatgattthttactaact<br>aactaatctgattthaaattthttcagatccgthtaacaat<br>cgaggacggatccgtccaactcgcgaccactacca<br>caaaaacccccaatcggagacggaccagthttctct |

|  |                                                                                                                                                                                       |                                                                                                                                                                                                                                                                                                                                                                                                                                                                                                                                                                                                                                                                                                                                                                                                |
|--|---------------------------------------------------------------------------------------------------------------------------------------------------------------------------------------|------------------------------------------------------------------------------------------------------------------------------------------------------------------------------------------------------------------------------------------------------------------------------------------------------------------------------------------------------------------------------------------------------------------------------------------------------------------------------------------------------------------------------------------------------------------------------------------------------------------------------------------------------------------------------------------------------------------------------------------------------------------------------------------------|
|  | <p>gttcaacatcatctatccggatgcagtttccaaa<br/> cgctcccaaacacactattagttgtcgtaac<br/> ctcggttacctgaataccatccactgtcatcaa<br/> tattagcaaaactatcactctagttttctaatccc<br/> ttttattagcgtactgg</p> | <p>cccagacaaccactacctctccaccaatccgcctc<br/> tccaaggacccaaacgagaagcgtgaccacatggtc<br/> ctcctcgagttcgtcacccgccggaatcaccacg<br/> gaatggacgagctctacaaggttaagttaaaataac<br/> ttcgtatagcatacattatacgaagttatttcagggt<br/> ggcagcggaggtagccggcggttagtgaggcACGg<br/> ccggaaacgttgtggacgactcaacgacgattggt<br/> gtacctactccacagagaacggacgtaagagcttct<br/> ccgcaatggtcggagacattttgaaagagccggca<br/> atgcgatttctcccgtagaacagatacagagggt<br/> agatcagtgtggacatttcttttaacacactaaaat<br/> ccgtgtttggttttgatttggttgcctggagacgtc<br/> agaaaacatgttaaattccgttagagtaaacaatagtc<br/> aattggaaaaacagaaatagtggaagtttagatttt<br/> atcttgaggaataaacaattaatgtataagaagca<br/> attctaacatacacgtaaacctttattttgttctttg<br/> caaccagcacaattgtttcatataggaactcaaa<br/> gtaccaagtacccaaaagtttacttgactcctccca<br/> acccctcacg</p> |
|--|---------------------------------------------------------------------------------------------------------------------------------------------------------------------------------------|------------------------------------------------------------------------------------------------------------------------------------------------------------------------------------------------------------------------------------------------------------------------------------------------------------------------------------------------------------------------------------------------------------------------------------------------------------------------------------------------------------------------------------------------------------------------------------------------------------------------------------------------------------------------------------------------------------------------------------------------------------------------------------------------|

Flanking sequence

Added/removed sequence
